# Supplementary material for: Genome-Wide Modeling of Transcription Preinitiation Complex Disassembly Mechanisms using ChIP-chip Data
Source: PLoS Comput Biol. 2010 Apr 1;6(4):e1000733. doi: 10.1371/journal.pcbi.1000733 (PMC2848545; doi:10.1371/journal.pcbi.1000733)
Supplement: Dataset S1 — Principal Component Analysis (PCA) of the six GTF's (0.01 MB XLS) [file pcbi.1000733.s010.xls]

## Sheet: Sheet1
EIGVALUE	NAME	GWEIGHT	TBP	TFIIB	TFIIE	Pol	TFIIF	TFIIH
59.9595	59.9595	1	-0.111057	-0.462083	-0.285959	-0.436154	-0.541307	-0.457307
27.6931	27.6931	1	0.0412931	-0.077821	0.528392	-0.411724	0.537163	-0.504956
24.0449	24.0449	1	-0.0226048	-0.00441778	0.790099	0.0277174	-0.584454	0.18127
19.905	19.905	1	0.0566959	0.877649	-0.104308	-0.283985	-0.247518	-0.271525
12.8575	12.8575	1	-0.0998157	-0.00910034	-0.0513643	-0.742112	0.101784	0.652859
12.2174	12.2174	1	0.986039	-0.100271	-0.0354245	-0.0900409	-0.0723255	0.0554962
