# Supplementary material for: Genome-Wide Modeling of Transcription Preinitiation Complex Disassembly Mechanisms using ChIP-chip Data
Source: PLoS Comput Biol. 2010 Apr 1;6(4):e1000733. doi: 10.1371/journal.pcbi.1000733 (PMC2848545; doi:10.1371/journal.pcbi.1000733)
Supplement: Dataset S3 — Median occupancy levels for gene groups (0.03 MB XLS) [file pcbi.1000733.s012.xls]

## Sheet: Two Factors
TBP	TFIIB	Cluster	No. of Genes
0.610164	2.02068	(L, L)	3252
3.30169	20.8752	(L, H)	2105
23.0498	3.00093	(H, L)	49
15.014	62.0201	(H, H)	337

## Sheet: Three Factors
TBP	TFIIB	Pol II	Cluster	No. of Genes
0.477008	1.66691	0	(L, L, L)	2593
1.20495	3.78658	17.087	(L, L, H)	659
2.92633	19.3877	2.83906	(L, H, L)	1229
3.99337	24.3411	19.4502	(L, H, H)	876
22.9113	2.40918	0	(H, L, L)	38
29.0807	4.20197	15.3338	(H, L, H)	11
14.4129	53.4738	3.0651	(H, H, L)	85
15.3569	69.4214	33.1417	(H, H, H)	252

## Sheet: Four Factors
TBP	TFIIB	Pol II	TFIIH	Cluster	No. of Genes
0.256281	1.03353	0	2.44961	(L, L, L, L)	1981
1.34342	4.03863	0.780415	14.745	(L, L, L, H)	612
0.771201	2.61476	17.2718	4.24175	(L, L, H, L)	371
1.96819	5.15562	16.9087	17.6881	(L, L, H, H)	288
1.64533	15.0547	1.61458	7.03157	(L, H, L, L)	349
3.57704	21.9525	3.50132	17.9598	(L, H, L, H)	880
1.86005	16.6404	17.1384	7.30268	(L, H, H, L)	137
4.39389	26.6067	19.9389	23.6665	(L, H, H, H)	739
25.4804	1.98362	0	2.12211	(H, L, L, L)	27
16.0467	3.33964	0.375838	17.1196	(H, L, L, H)	11
29.0807	4.20197	15.3338	4.83736	(H, L, H, L)	11
14.4129	53.4738	3.0651	40.3138	(H, H, L, H)	85
15.3569	69.4214	33.1417	67.0427	(H, H, H, H)	252

## Sheet: Five Factors
TBP	TFIIB	Pol II	TFIIF	TFIIH	Cluster	No. of Genes
0.169927	0.60951	0	0.270821	1.94632	(L, L, L, L, L)	1683
1.1438	3.07501	0.476088	1.46234	14.81	(L, L, L, L, H)	397
0.914304	4.36605	0.799553	15.0557	5.27296	(L, L, L, H, L)	298
1.71264	5.58144	1.50713	18.2056	14.6919	(L, L, L, H, H)	215
0.59387	1.89621	17.3968	0.627518	3.8359	(L, L, H, L, L)	278
1.54066	4.27348	17.4113	1.2003	16.7115	(L, L, H, L, H)	171
1.31278	5.40274	16.9196	16.2873	5.81157	(L, L, H, H, L)	93
2.47105	6.4115	16.1112	20.6452	19.8024	(L, L, H, H, H)	117
1.56331	13.4538	1.2758	6.30456	7.00186	(L, H, L, L, L)	131
2.80473	17.0161	3.53025	5.29842	16.2352	(L, H, L, L, H)	193
1.67225	16.714	1.80035	16.7647	7.10743	(L, H, L, H, L)	218
3.78711	23.6672	3.47369	23.7842	18.5942	(L, H, L, H, H)	687
1.78681	16.1494	15.486	5.36496	7.72001	(L, H, H, L, L)	49
3.51865	20.009	20.5169	3.60695	24.7063	(L, H, H, L, H)	159
1.86804	16.8308	18.331	16.7031	7.11652	(L, H, H, H, L)	88
4.55556	29.2866	19.8194	27.0642	22.9268	(L, H, H, H, H)	580
25.4804	1.98362	0	4.15656	2.12211	(H, L, L, L, L)	27
16.0467	3.33964	0.375838	6.93842	17.1196	(H, L, L, L, H)	11
29.0807	4.20197	15.3338	1.94195	4.83736	(H, L, H, L, L)	11
14.4129	53.4738	3.0651	32.1501	40.3138	(H, H, L, H, H)	85
15.3569	69.4214	33.1417	51.5279	67.0427	(H, H, H, H, H)	252

## Sheet: Six Factors
TBP	TFIIB	Pol II	TFIIE	TFIIF	TFIIH	Cluster	No. of Genes
0.169927	0.60951	0	0.13012	0.270821	1.94632	(L, L, L, L, L, L)	1683
1.1438	3.07501	0.476088	3.12663	1.46234	14.81	(L, L, L, L, L, H)	397
0.688102	3.71065	1.5962	6.84602	13.2365	3.76478	(L, L, L, L, H, L)	123
1.13812	4.97891	0.398408	14.3729	16.9078	6.40312	(L, L, L, H, H, L)	175
1.71264	5.58144	1.50713	19.9765	18.2056	14.6919	(L, L, L, H, H, H)	215
0.59387	1.89621	17.3968	0.0216856	0.627518	3.8359	(L, L, H, L, L, L)	278
1.54066	4.27348	17.4113	1.14742	1.2003	16.7115	(L, L, H, L, L, H)	171
1.27209	4.46145	17.3226	5.66932	15.3291	4.30019	(L, L, H, L, H, L)	51
1.90787	3.67967	17.3437	5.08551	14.4728	15.9995	(L, L, H, L, H, H)	26
1.57252	6.65617	16.5207	14.4855	16.5499	7.35656	(L, L, H, H, H, L)	42
2.65109	7.08057	16.0553	23.2926	22.5331	20.5405	(L, L, H, H, H, H)	91
1.56331	13.4538	1.2758	6.05473	6.30456	7.00186	(L, H, L, L, L, L)	131
2.81828	17.0161	3.75449	4.44502	3.96478	16.0868	(L, H, L, L, L, H)	147
1.3092	16.7376	1.81071	7.93831	12.3638	5.39949	(L, H, L, L, H, L)	59
2.61527	17.3829	2.11126	13.7923	7.9484	16.6785	(L, H, L, H, L, H)	46
1.86552	16.6905	1.68424	15.9982	19.0098	7.56935	(L, H, L, H, H, L)	159
3.78711	23.6672	3.47369	23.3455	23.7842	18.5942	(L, H, L, H, H, H)	687
1.78681	16.1494	15.486	5.20797	5.36496	7.72001	(L, H, H, L, L, L)	49
3.51865	20.009	20.5169	5.01879	3.60695	24.7063	(L, H, H, L, L, H)	159
1.29103	15.3909	22.6392	7.70617	12.5247	6.24847	(L, H, H, L, H, L)	35
1.97458	18.6948	17.9792	18.1249	20.4953	7.89101	(L, H, H, H, H, L)	53
4.55556	29.2866	19.8194	26.6194	27.0642	22.9268	(L, H, H, H, H, H)	580
25.4804	1.98362	0	4.94519	4.15656	2.12211	(H, L, L, L, L, L)	27
16.0467	3.33964	0.375838	7.2732	6.93842	17.1196	(H, L, L, L, L, H)	11
29.0807	4.20197	15.3338	4.88743	1.94195	4.83736	(H, L, H, L, L, L)	11
14.4129	53.4738	3.0651	36.987	32.1501	40.3138	(H, H, L, H, H, H)	85
15.3569	69.4214	33.1417	57.9311	51.5279	67.0427	(H, H, H, H, H, H)	252

## Sheet: Affymetrix High Density array
Affymetrix high density array analysis
Two-Factor Analysis (High Density Probes)								Medians for Low Density Probes of Genes Reporting for the High Density Probes
	TBP %	TFIIB %			# of Reporting Genes				TBP %	TFIIB %
(L, L)	2.85232	5.40828			1060			(L, L)	0.599663	2.02832
(L, H)	5.24034	15.55			869			(L, H)	3.28409	21.4743
(H, L)	26.6018	8.07319			20			(H, L)	22.9113	3.22648
(H, H)	14.3566	33.9905			167			(H, H)	14.5508	57.1009
Three-Factor Analysis (High Density Probes)
	TBP %	TFIIB %	Pol II %		# of Reporting Genes				TBP %	TFIIB %	Pol II %
(L, L, L)	2.81265	5.18619	1.82335		783			(L, L, L)	0.499368	1.59183	0
(L, L, H)	2.90477	6.47705	2.80336		277			(L, L, H)	1.03189	3.18633	18.3458
(L, H, L)	5.21706	14.3655	1.83431		474			(L, H, L)	2.99593	18.5302	2.86089
(L, H, H)	5.28766	17.2687	3.27667		395			(L, H, H)	4.09139	25.8493	20.0054
(H, L, L)	47.4275	8.10042	2.44715		15			(H, L, L)	22.7729	3.45203	0.280639
(H, L, H)	5.77612	8.04595	4.74014		5			(H, L, H)	22.5556	3.99228	15.3338
(H, H, L)	14.1372	25.8033	10.8063		32			(H, H, L)	12.8742	54.2046	3.06672
(H, H, H)	14.6994	35.2787	18.8078		135			(H, H, H)	15.014	60.1663	34.4636
My steps
1) Match all probes dowloaded from Mavrich et al Genome Research 2008 ALL GENES (including non-mRNA coding genes)
2) Took the medians of the probes signals
3) With those medians, use the upper 1% as the upper 100%, and use formula that was used in low-density arrays to calculate percent binding here
4) Remove all genes that had at least one "NAN" in it
5) Filter out the genes in the two- and three-factor clusters we had in the paper
